# Supplementary material for: A qualitative systematic review of the sociocultural barriers accessing ART experienced among subfertile women across Africa and Europe
Source: Research Square preprint supplement (doi:10.21203/rs.3.rs-7919549/v1), 2025-10-25
Supplement: Supplementary file 1 [file 009abf4ea564e185b95cd92a.docx]

**Table I: Study Characteristics of included studies I**

| **First Author and Year** | **Study Design and Setting** | **Study dates** | **Study Objective** | **Ethnic origin of participants and sample size** | **Ethnic origin of comparison group and sample size** |
| --- | --- | --- | --- | --- | --- |
| Gerrits (1997) | Method of data collection: Semi-structured interview and participatory observations  Method of analysis: Interpretative phenomenological analysis?  Setting: Community (home, Mozambique) | 1993 | Exploring the social and cultural aspects of infertility in Mozambique | Macua (Mozambique)  Size: 34 | - |
| Bailey et al. (2017) | Method of data collection: Semi-structured interview)  Method of analysis: Grounded theory  Setting: Community, Unstated (UK) | Unstated | To provide a model of resilience among women undergoing fertility treatments, who experience repeated unsuccessful conception attempts | - | British, Latvian and mixed British and Asian  Size: 11 |
| Hollos (2003) | Method of data collection: Semi-structured interview  Method of analysis: Ethnography  Setting: Community (home, Ijaw community, Nigeria) | 2002 | To illustrate how local meanings of infertility of are shaped by the social and cultural context and how they influence the life experiences and coping behaviours of infertile women in an Ijo community in the Niger Delta | Ijo (Nigeria)  Size: 6 | - |
| Mariano (2004) | Method of data collection: Interview  Method of analysis: Ethnography  Setting: Community (rural communities in Mozambique) | 2001 - 2002 | To understand the experiences of infertility in Shangana society, describe the ways in which people seek solutions and explore the individual and social implications of reproductive failure | Shangana (Mozambique)  Size: 18 | - |
| Magobe (2005) | Method of data collection: Unstructured interview (open ended questions)  Method of analysis: Interpretative phenomenological analysis?  Setting: Community (rural communities, Gaborone, Botswana) | Apr - Sep 1997 | Explore the meaning of infertility and describe how women felt that their spouses, friends and relatives influence this; delineate the processes and strategies used by women in dealing with infertility | Botswana  Size: 40 | - |
| Yebei (2000) | Method of data collection: Exploratory in-depth interviews, informal discussions  Method of analysis: Thematic analysis  Setting: Community (home and workplace, Netherlands) | 1999 | To determine the attitudes and needs of infertile Ghanaian women living in Amsterdam and examine barriers to ART access | Ghanaian  Size: 12 | - |
| Dierickx et al. (2019) | Method of data collection: Interview, informal conversations and group discussions  Method of analysis: Thematic analysis  Setting: Community (rural and urban communities in The Gambia) | 2017 - 2018 | Understand the health seeking behaviour of women with infertility and the influence of etiological beliefs on health seeking paths | Mandinka, Jola and Karonika (participants were from The Gambia and Senegal)  Size: 36 | - |
| Dierickx et al. (2018) | Method of data collection: Interviews, group discussions and participant observation with informal conversation  Method of analysis: Thematic analysis  Setting: Urbanised region of The Gambia | 2017 - 2018 | Understand the implications of infertility in urban Gambian communities; examine how this relates to cultural practices | Mandinka, Fula, Masiwanka, Wolof, Serer, Aku and Karonika (The Gambia)  Size: 33 | - |
| Fledderjohann (2012) | Descriptive qualitative study: Semi-structured interviews  Setting: Secondary care (four health clinics (with an emphasis on gynaecology and obstetrics outpatients, Ghana) | 2008 | Explore the implications of infertility in Ghana | Ghanaian  Size: 107 | - |
| Weinger (2009) | Method of data collection: Descriptive qualitative study, Structured in-depth interviews  Method of analysis: Thematic analysis  Setting: Community (Interviewer apartment, Cameroon) | Unstated | Examine Cameroonian coping measures for childlessness and the subsequent social marginalisation experienced | Cameroonian  Size: 5 interviewed (out of 10 approached) | - |
| Roberts & Franklin (2004) | Method of data collection: Semi-structured, formal and informal interviews and participant observations  Method of analysis: Thematic analysis  Setting: Respondent’s home | Feb 2001 - Aug 2003 | Investigate how patients experience PGD and how it fits into their lives, reproductive histories and futures? | British  Size: 21 | - |
