# Supplementary material for: A qualitative systematic review of the sociocultural barriers accessing ART experienced among subfertile women across Africa and Europe
Source: Research Square preprint supplement (doi:10.21203/rs.3.rs-7919549/v1), 2025-10-25
Supplement: Supplementary file 4 [file 81ddedcf5b268d8766cbe3ad.docx]

## Additional File 5: Exclusion Criteria

|  | **Exclusion criteria** |
| --- | --- |
| **Population of interest** | Ethnic status Although it might be limiting, in terms of potentially including an insufficient number of studies, it is vital as an inability to identify ethic status would leave uncertainty around the relevance of the factors examined to the the population of interest. |
| Undefined or unique populations Studies that did not provide a definition of subfertility, did not have the experience of African and Caribbean women as an outcome or had not explored or adjusted for any of the risk factors that affect their experiences were also excluded. For this reason trans women as well as women in same-sex relationships were excluded as their experiences are very unique and would not compare with a cis gender woman. Likewise, mixed race women were not included because their experiences would not compare with an African or Caribbean woman due to the uniqueness of their experience. |
| Health professionals views only |
| **Study Design** | Study design Quantitative studies (including randomised controlled trials, interventional and surveys) |
| Reviews and conference abstracts Studies that did not present original data such as review articles were also excluded but their list of references were searched for original research studies that met inclusion criteria. Conference abstracts were also excluded because they provide insufficient details of methodology to critically appraise. |
| Language Non-English language articles (for example, from French speaking African countries such as Rwanda) were excluded as results were unlikely to affect the conclusion. This is because there is likely to be enough similarity between the population of interest in such studies and those in studies written in English-speaking countries. Excluding such studies avoids the possibility of missing any subtleties.  This allows the quality rather than its translation of the study to be assessed. For example, a translating error could result in the true intent of the study being misconstrued. |

Additional File 5: Exclusion criteria
