# Supplementary material for: A qualitative systematic review of the sociocultural barriers accessing ART experienced among subfertile women across Africa and Europe
Source: Research Square preprint supplement (doi:10.21203/rs.3.rs-7919549/v1), 2025-10-25
Supplement: Supplementary file 6 [file a57414b90d321f454d683e34.docx]

**Table 5:** **Summary of Descriptive Themes: Perceived Barriers to Access**

| **Analytical Theme:**  **Perceived Barriers to Access** | **Descriptive Theme:**  **Perceived Barriers to Access** | **Summary of Findings** | **Illustrative Quote(s)** |
| --- | --- | --- | --- |
| Religious and Cultural Proscription | 3.5.1 Spirituality: Supernatural | Africans: Infertility was attributed to in-laws, immoral behaviour, witchcraft or ancestral curses. They sometimes turned to traditional healers and religion for strength alongside medical treatment [46;34;50; 54].  Cameroonian women were hesitant to accept major medical interventions fearing it was "working against God’s will" (Weinger 2009). Although Botswanan women were unsure how, convinced they offended God, some questioned, "Ga ke itse gore Modim eng" (what they had done) [51]. Women reason faith grounded them in God’s power and believed church attendance strengthened their faith. Ghanaian women perceived infertility as a spiritual, rather than physical problem that ultimately requires redress of the social and psychological aspects they believe underlie it [54]). Unlike UK respondents, the perceived importance of spirituality was not affected by awareness of ART even when resources were emotionally and practically exhausted [48;54]. Priests and pastors helped Ghanaian women cope and in some churches, individualised prayer programmes tailored uniquely to them were developed.  UK: In contrast, religion was not used as a coping mechanism. When practical and emotional resources were exhausted, they temporarily discontinued treatment to reconnect with their 'normal' lives that did not centre on fertility [48] | "Most of this is attributed to witchcraft... If you are 36, 38, and you haven’t had a child, people will say it is because of something from a former life, or it is your grandmother, witchcraft, or that your womb has been taken to the North or is being used for ritual purposes" [34]  "… rather than spending hours trying to research my cure for myself… through sort of looking at stuff online, reading papers, whatever, I’m practising my singing and practising my yoga… I’m enjoying those things”[48] |
| Religious and Cultural Proscription | 3.5.2 Spirituality: Natural | The Gambia: Attention is given to folk illnesses (including fibroids) that are detectable through biomedical approaches, prior abortions, overdoses of family planning tablets or injections.  Other respondents perceived infertility or miscarriage may be the result of the stress arising from the hard work involved tending to the compound, farms and gardens; a tight vagina; a weak womb that results in sperm runoff after intercourse or the presence of hot water inside the stomach [46]. | "I heard from people that my brother’s wife used to take the family planning tablets before she got married. Now… she could not become pregnant and people said that she overdosed herself with the tablets" [46] |
| Religious and Cultural Proscription | 3.5.3 Solutions: Medical Pluralism - Home, traditional/ indigenous and biomedical treatment | As indicated by frequent alternation and combinations of pursued treatment, Ghanaian, Botswana and Gambian women showed no preference of modern health care over more traditional methods [51;52;54].  Although all women visited private and public health centres when women perceived the cause to be due to natural factors, particularly young and highly educated women expressed a preference for private facilities, though financial barriers limited their access. Preference for private health centres was due to perceived beliefs that diagnosis tools, better equipment, professionalism and motivation levels of staff were better.  Ghanaian respondents preferred Ghanaian herbalists in Amsterdam who dispensed herbs for infertility to doctors as they promised an immediate cure, spoke their language and patiently tackled their problem holistically in order to heal their body and 'broken' social networks [54]. Herbalists were also favoured because of their affordable fees, more accessible locations, expeditious appointments that lasted as long as the women required and flexible consultation schedules. Additionally, as payments could be made in instalments, they were more accessible to those on a low income. However, those that did not use herbalists were dubious about them for religious reasons and as Christians, avoided them as they were concerned herbalists operated under evil influences. |  |
| Religious and Cultural Proscription | 3.5.4 Solutions: Adoption and Fostering | The Netherlands, Nigeria and Botswana:  Interestingly, after all attempts at conceiving a biological child failed, a rare strategy considered by the women who underwent ART was adoption. Although all Botswanan women were aware of the traditional form of adoption, few were aware this was an option and of the few who understood its legal process, resistance from spouses and/ or relatives was faced [51].  Women had misgivings about customary adoption due to lack of spousal and familial support and fears of potential rejection if their child returned to their biological parent/s [54]. Their concerns regarding customary adoption was due to potential rejection if their child decided to return to their biological parent(s), anxieties of possible parental intervention or a custody challenge if there were welfare concerns and apprehension of the child 'inheriting' the bad character traits of their biological parents 51;53;54].  Similarly, although Cameroon women reported their non biological children are like their own and eased the pain of their childlessness, they questioned the legitimacy of the bond [50;54]. Likewise, although Nigerian respondents fostered children from relatives, agricultural work was often a motivating factor and they expressed that it did not fill their emotional void [53]. In contrast, women from Mozambique expressed great interest in adoption ([55]. However, although more than half of the respondents cared for mainly their relatives’ children, Botswanan, Ghanaian, Nigerian and Cameroonian women reported problems. For example, biological parents at times accused them of mistreatment or exploitation whereas others complained they felt at times that children they cared for disobeyed them because they are "not the real mother".  UK: Unlike studies conducted with women of African descent, there is more emphasis on the 'internal force' driving the need of British women to have their own biological child [48;49]. | "Sometimes I think that if this was my own child he wouldn’t react that way to me. I think if this was my own child I would treat him differently" [50]  "Some people are a lot more accepting and think ‘OK what are our other options?’… ’We can adopt’. I just kind of really desperately want to become pregnant" [48] |
| Strained Social Interactions | 3.5.5 Marital Strain | Africans: Few marriages were able to manage the long-term impact of infertility. Some women reported physical, emotional and financial abuse and feared divorce [34;47]. Although Gambian respondents shared gossip of others they knew in extramarital relationships, in practice, the consequences were less severe for men in Gambian, Ghanaian and Mozambique culture as it is considered to be in their 'nature' [34;47]. Women confessed if their husband was infertile, becoming pregnant even with another man was better than risk divorce.  Muslim respondents feared their husbands would engage in polygyny. Although men were supposed to engage in polygyny only if they had the financial means, in practice, economically, infertility impacted the daily lives of women regardless of their financial position. For example, as sons receive double the share of the inheritance than wives under Sharia law, co-wives or in-laws can expel childless widows with limited resources after their husband's death. Nigerian women also expressed marginalisation from relatives as a result of of polygyny [53].  The experience drove women to either initiate divorce, have extramarital relationships to become pregnant or 'marry' another woman. In this latter case, paying another woman’s bride price in order to lay a claim to future children the new wife had with her husband was believed to be a stronger alternative to simple fostering. This strategy also relates to traditional Tswana custom where a husband has a right to ask his spouse/ her family to provide him with another woman to bear children [51].  Interestingly, apart from Nigerian respondents who most frequently initiated divorce, African women rarely left despite their discontent, as they believed marriage was an important social and cultural institution [47;51;53]. African women highlighted the difficulty women faced discussing marital issues, sexuality and infertility amongst another or specialists and reported that even conversations about infertility related pains were vague [46]. | "Having children is also important for the economic security of women. When a woman remains childless, the husband will refuse to give his wife fish money or to provide clothes. She is chased away directly, but commonly indirectly by not providing financial support. These women will often return to the compound of their parents" [47] |
| Strained Social Interactions | S3.5.6 Social Support | Africans: Being denied appropriate status in society made them feel their personhood was disintegrating. Some exhibited symptoms of depression ranging from crying to insomnia to suicidal ideation. As a result, they were careful to conform and moved between reality and denial as a coping mechanism to the emotional devastation of social exclusion [51].  The Gambia: Women reported the kanyaleng kafoo provided them with social, emotional and even financial support. Tensions with in-laws, particularly mothers-in-laws escalated whilst living within the same compound, as customs dictate, as they were subjected to harassment. The bride price also exacerbated issues with in-laws. Although the price between ethnic groups and family differed, it often consisted of a large amount of goods, cash or animals. As this exchange illustrated a transfer of the reproductive capacities of a woman to her husband’s family, in-laws argued they had not received a a 'good' wife who could bear children in return.  Stable employment also allowed women to escape the stigma faced in rural communities [47]. Women residing in urban communities even received financial assistance from employers and a forum (a therapy management group) to discuss their fears and concerns in open to their husbands, relatives, friends [46].  Ghana: Women were excluded from community decisions and activities (e.g., child rearing conversations/ discouraged from interacting with children) [34].  Botswana: Women emotionally distanced themselves from the pain of unsuccessful treatment, stigma and 'denying' their needs by focusing on community service, their career and the idea of permanently discontinuing treatment [51].  UK: Women excluded themselves from others even if it was at the expense of having a wide social network. They felt a sense of responsibility to others, were afraid of being a burden and were wary of societal attitudes [48;49]. | "There is a lot of social stigma… my first child after five years of marriage and that one passed away... It took me another four years to become pregnant. Sometimes… I will be hearing… throwing words at me…”[47]  "… I haven’t wanted to be in the same environment as my sister-in-law, especially when she was late in her pregnancy and just recently when the baby’s been born, because I’ve found it quite difficult to be around her" [48]  "every decision.. affects everyone else as well, all our friends, our families. Every decision we make is indirectly going to affect somebody else, and I think that’s where a lot of people don’t seem to get…" [49] |
