# Supplementary material for: A qualitative systematic review of the sociocultural barriers accessing ART experienced among subfertile women across Africa and Europe
Source: Research Square preprint supplement (doi:10.21203/rs.3.rs-7919549/v1), 2025-10-25
Supplement: Supplementary file 7 [file acbb94d491823f7a12cbc032.docx]

## Additional File 1: Dimensions of quality of care for access

| **Individual Care** | | |
| --- | --- | --- |
| **Healthcare system**  **(Structure)** | **Patient-centred care**  **(Process)** | **Consequences of Care**  **(Outcome)** |
| Structure: Definition  - Structure refers to the organisational factors that define the health system and consist of two domains: physical and staff characteristics - Structural features of healthcare provide the opportunity for people to receive care and within a systems based model of care can have a direct effect on processes and outcomes. For example, if all appointments are booked up, a patient will be unable to access care | Process: Definition Two key features of the processes of care include clinical interventions and interpersonal interactions between staff and users and involve the definition and communication of needs, diagnoses, their management and co-ordination by the both the patient and health professional concerned | Outcome: Definition Outcome is considered a consequence rather than a component of care. For example, a patient may die from cancer because a screening service was unavailable (structure) or because the cytology report was misread (process) |
| Access This relates to geographic or physical barriers that include:   - *Rurality*   This hinders an individual’s ability to travel to fertility treatment centres   - *Physical hindrances*   This prevents disabled people accessing services | Affordability (see Healthcare system column) | Health Status |
| Affordability This is an important aspect of access in countries or areas of the UK where fertility treatment is not provided by the state and includes financial barriers as well as social role commitments (Campbell et al. 2000; Young 1996):   - *Financial barriers*   This may be relevant in terms of the transport, childcare or prescription costs involved when attending an appointment or the opportunity cost (loss of earnings).   - Other barriers include social role commitments such as single working mothers with young children trying to fit fertility treatment appointments around their daily routine | Availability (see Healthcare system column) | User Evaluation As user attitudes reflect experiences of care, what they regard as acceptable treatment (via evaluations) influences future decisions about accessing fertility treatment again especially if they felt they were spoken to disrespectfully |
| Availability This is defined as the extent to which the health care system provides structures (facilities) and processes (services), such as a specialist fertility treatment centre, that meet the needs of users   - *Organisational access*   This is a subcomponent of availability and barriers and may arise through, viability and length of appointments or whether the health care professional can speak the user’s language. Thus it becomes apparent that in a system reliant on the primary care practitioner being the ‘gatekeeper’, access to fertility treatment is determined by access to a primary care practitioner and his/her referral behaviour   - *Contact, comprehensiveness and continuity of care*   These are three of the four dimensions of quality that are of particular relevance in primary care services, and that have been suggested to be aspects of availability. A UK study argues that these should be quality attributes in their own right. For example, although continuity of care from a health professional with poor communication skills is not good quality care, such a person could score highly in access and patient evaluation areas | Geographic or Physical Access  - *Rurality*   This hinders an individual’s ability to travel to fertility treatment centres   - *Physical hindrances*   This prevents disabled people accessing services |  |

Additional File 1: Dimensions of quality of care for access (Campbell et al. 2000)
