# Supplementary material for: A qualitative systematic review of the sociocultural barriers accessing ART experienced among subfertile women across Africa and Europe
Source: Research Square preprint supplement (doi:10.21203/rs.3.rs-7919549/v1), 2025-10-25
Supplement: Supplementary file 8 [file b07bd439ac2f7994b16dafb0.docx]

## Additional File 6: Legal Coverage of IVF Coverage in Europe in 2009

| **Country** | **Coverage Level** | **Maximum Cycles Covered** | **Age Limit**  **(Years)** | **Only Medication Indications** |
| --- | --- | --- | --- | --- |
| Austria | Partial | 4 | Strict female <40  Male <50 | Yes |
| Belgium | Full | 6 | Strict <40 | Yes |
| Denmark | Partial | 3 | Strict <40 | No |
| Finland | Partial | Varies | None | No |
| France | Full | 4 | Strict <43 | Yes |
| Germany | Partial | 3 | Strict female <40  Male <50 | Yes |
| Greece | Partial | Varies | Strict <50 | Yes |
| Italy | Partial | Varies | Soft  (child-bearing age) | Yes |
| Netherlands | Full | 3 | Strict <45 | Yes |
| Portugal | Partial | Varies | None | Yes |
| Spain | Partial | 3 | Soft | Yes |
| Sweden | Full | Varies | Soft  (child-bearing age) | Yes |
| UK | Partial | Varies | Strict <40 | Yes |

Additional File 6: Legal Coverage of IVF Coverage in Europe in 2009
