# Supplementary material for: A qualitative systematic review of the sociocultural barriers accessing ART experienced among subfertile women across Africa and Europe
Source: Research Square preprint supplement (doi:10.21203/rs.3.rs-7919549/v1), 2025-10-25
Supplement: Supplementary file 9 [file cb3e68b27c10138e58c40731.docx]

**Table 4: Contents of the Findings of Included Studies**

| **Perceived Barriers to Accessing Fertility Treatment Themes** | |
| --- | --- |
| **Religious and Cultural Proscriptions** | 3.5.1 Spirituality: Supernatural |
| 3.5.2 Spirituality: Natural |
| 3.5.3 Medical Pluralism: Home, traditional/ indigenous and biomedical treatment |
| 3.5.4 Adoption and Fostering |
| **Social Strain** | 3.5.5 Marital Strain |
| 3.5.6 Social Support |
