# Supplementary material for: A qualitative systematic review of the sociocultural barriers accessing ART experienced among subfertile women across Africa and Europe
Source: Research Square preprint supplement (doi:10.21203/rs.3.rs-7919549/v1), 2025-10-25
Supplement: Supplementary file 10 [file e485f345d26f4f94cd41df0b.docx]

**Table 2:** Study characteristics of included studies II

| **First Author and Year** | **Perceived Barriers/Experiences of Quality of Care** | **Conclusions** | **Overall Quality** |
| --- | --- | --- | --- |
| Gerrits (1997) | Infertility is perceived to originate from the acts of people, spirit or witches or natural causes  Infertile women experience exclusion from social activities and traditional ceremonies; divorce; psychological distress | Infertile women apply various strategies to have a child: (i) treatment (via biomedical treatment centres and traditional healers); (ii) adultery and (iii) fostering  Women suffer social exclusion and psychological distress. Infertility needs to be considered in a culturally sensitive way by policy and programme makers - improved interventions (beyond preventive measures) considering existing cultural practices and perceptions of patients re: quality of care is vital. | **L** |
| Bailey et al. (2017) | Affordability and availability | Experiencing adversity led them to identify their resilient qualities through (i) recognising their own strength (ii) relying on strategies which helped them get through previous experiences of adversity and (iii) by taking control of their treatment.  However, efforts to build themselves had emotional and practical costs.  Clinicians should be mindful of the need to gain control over treatment by seeking other methods - particularly relevant among minority ethnic groups and those with less access to publicly funded health care. | **M** |
| Hollos (2003) | Social strain: Marital instability; marginalisation in the household and exclusion from community social activities and traditional ceremonies | Women developed coping mechanisms: (i) Biomedical and local remedies; (ii) risky behaviours to become pregnant; (iii) ’marry other women' to become an 'owner' of children; (iiv) fostering; (iv) feigning pregnancy/ miscarriage  These strategies had psychological implications (depression, anxiety or stress). | **L** |
| Mariano (2004) | Religiosity/ spirituality (punishing spirits inflict infertility due to deviation from the rules of patrilineal society); social exclusion from traditional ceremonies/ rituals and activities; marital instability  Results in psychological/ emotional pain | Healers are their first or only line of therapeutic resort. Although patients are sent to the health centre for treatment if healers are not efficacious, good local ones are scarce and lack the services for women to 'release their pain' so they can overcome their emotional as well as physical suffering | **L** |
| Magobe (2005) | Women perceived infertility as denying of self to varying degrees within the social context of patriarchy: (i) denial of status as a woman; (ii) denial of economic and social security in old age and (iv) denial of immortality (infertility sign of supernatural chastisement) | Women developed coping strategies including looking for deeper meaning, giving in to feelings, compromising, getting away from fertility related issues and pursuing adoption to protect themselves from emotional harm. | **L** |
| Yebei (2000) | Poorer access and availability  (i) Inter-cultural misunderstandings led women to misinterpret clinical decisions/ approach; (ii) Language barriers left Ghanaian women unable to access existing Dutch information materials; (iii) As Dutch national health policy prohibits ART at 40, availability was limited (iv) Stigmatisation for childlessness | Given the low success rates, more effort to understand how cultural differences among migrant populations may affect perspectives of the quality of fertility treatment is vital  Although women saw adoption and fostering as temporary and unacceptable, more information in various languages on adoption and fostering in hospitals may better inform those willing to try it  The range of factors associated with infertility must be better communicated due to the strong cultural belief that ovulation, irrespective of age, was a sign of fertility. The role of STDs also require better explanation (especially considering the possible occurrence of extramarital sex) | **M** |
| Dierickx et al. (2019) | Women used both biomedical and indigenous treatment from local healers, sacred places and kanyaleng groups depending on (i) Perceived aetiology of infertility; (ii) perceived effectiveness of available treatment; (iii) duration of the fertility problem; (iv) affordability; (v) accessibility (which was influenced heavily by SES if the biomedical health sector was being considered); (vi) availability of treatment and (vii) respondents’ family and social networks | Attributing delay, adherence and treatment choice to 'traditional' beliefs or lack of knowledge does not reflect the pragmatism behind infertile women’s choices in their health seeking given the existing structural inequalities they experience. Health authorities should provide information, counselling on infertility prevention and treatment and develop health systems guidelines for infertility management | **M** |
| Dierickx et al. (2018) | Unable to conform to their gender role amidst a strong social pressure to procreate, infertile Gambian women were faced with: (i) financial problems; (ii) social stigma and (iii) emotional and physical violence in their marriage  Although social positions and identities interact and influence behaviour, the financial implications, social stigmatisation, marital problems and emotional difficulties faced, all women reported feelings of trauma, stress and sadness | The capacity of the health system needs to be built to follow up and provide psychological support as well as prevent and treat fertility problems (targeting individuals with little financial and social resources) | **M** |
| Fledderjohann (2012) | Women felt burdened with a disproportionate share of the blame for infertility and faced greater social consequences (ostracisation) than their partners. Familial and marital pressure to conceive resulted in emotional strain ranging from loneliness and worry to stress and depressive symptoms. Physical ailments ranging from headaches/ body aches reported as reactions to ART. | The findings suggest the consequences of infertility in Ghana are widespread and severe  Although data limitations make it unclear whether infertile women are significantly more likely to experience physical ailments, authors report the study provides preliminary evidence of a link between infertility and physical health | **L** |
| Weinger (2009) | Childless women are banished from homes and required to return their bride price. Those not college educated face higher risk of severe poverty as marriage for many is an economic means for survival in this pronatalist and patriarchal society.  Unable to produce biological heirs, they experience social rejection and are branded as deviants whose value is related to their reproductive function on behalf of men. | As childlessness is a threat to Cameroonian women’s survival, the provision of specific economic support and opportunities fo these women as well as increased access to adequate reproductive health services.  Community education, places of worship and support networks may help people understand the medical reasons for infertility (poor access to fertility clinics, lack of prenatal care, proper delivery conditions and treatment for STDs as well as safer abortion procedures) and alleviate shaming and loneliness | **M** |
| Roberts & Franklin (2004) | Decisions about treatment factored in the financial and social costs. Patients considered personal and familial relationships and were concerned how they were perceived by society (due to PGD stigma). | It is uncertain the extent to which care delivery is sensitive to their burdens and during/ after treatment when they encounter challenges or difficult decisions - assistance identifying suitable coping strategies may help circumvent the development of potential long term effects | **M** |

Table 2: Study characteristics of included studies II

Summary of perceived barriers/experiences of quality of care and quality of included studies
