# Supplementary material for: A qualitative systematic review of the sociocultural barriers accessing ART experienced among subfertile women across Africa and Europe
Source: Research Square preprint supplement (doi:10.21203/rs.3.rs-7919549/v1), 2025-10-25
Supplement: Supplementary file 12 [file ff2a4f393bedc4f80c5e2e04.docx]

## Additional File 4: Exclusion Criteria

|  | **Inclusion criteria** |
| --- | --- |
| **Population of interest** | Participants Studies that include African and Caribbean patients regardless of race, economic, marital, citizenship and residential status and from any linguistic, cultural and religious background will be incorporated in this review. This is because there are few published studies highlighting ethnicity as a determining factor of importance in fertility treatment outcome [13]. This may be attributable to most studies being based on small sample sizes with the inclusion of subjects of ethnicities and races that are unrepresentative of the UK population [11]. Furthermore, larger studies that are inclusive of ethnicity tend to be based on the population of Northern America [11]. |
| Countries Women from countries that have the highest number of registered IVF units in Africa, such as Ghana, Egypt, Nigeria and South Africa, will be included in this review [30].  Additionally, those from Barbados, which has achieved the most success marketing fertility services internationally in the Caribbean will be included (Ramirez de Arellano 2011). Women from Jamaica, which had high rates of out-migration to the UK at the time IVF was introduced will also be included as their treatment experience will be important and potentially different from that of recent migrants (Cooper 1985). Additionally, all countries, where the country of origin of the foreign born population in the UK exceeded 1000, were listed in the search term in order to mitigate the risk of excluding communities whose countries of origin not been included in the search.  Furthermore, countries such as France, Portugal, Belgium, Germany, Spain, Italy, The Netherlands and Sweden which have a similar healthcare system as the UK as well as a history of colonialism will also be included in the review [33-34]. |
| Previous treatment Women who were on consecutive fertility treatment rounds will be included. This is because, in some cultures the birth of one child results in their stigmatisation. As a result of feeling greater pressure to have more children and undergo treatment, they may suffer or present with mental health issues. |
| Age As women can access infertility treatment in the UK free of charge up until the age of 42, the inclusion of premenopausal women (18-35 year olds) who have also accessed these services is just as important. Studies report that it is the duration of subfertility (or subfertility with the intent to have a child) that has been linked to psychological stress [24]. For this reason it may be possible that perimenopausal or menopausal women who access infertility treatment later on in life may be better prepared against a prospective loss of childbearing years if their intention to have a child was of a comparatively shorter duration. It was stated this finding may have attributed to the fact that that younger women are just as susceptible as their older counterparts due to societal psychological and psychosocial pressure. |
| Marriage status Furthermore, as those in heterosexual partnerships represents 91% of those seeking treatment in the UK, it is possible that the needs of those without partners are not prioritised [35]. For this reason, those who were not in a relationship were included in this review. |
| **Exposure of interest** | Perceived quality of care The perceived quality of care or barriers impeding access to UK fertility treatment and services of subfertile African and Caribbean women during their patient journey. Treatment and services also included encounters with healthcare professionals.  Perception includes their beliefs, concerns, understanding and experiences. |
| **Study Design** | Publication date Older publications were eligible for inclusion as the aim is to capture any change in experiences over time. |
| Data collection method Data collection methods searched for were interviews, focus groups and ethnographic studies |
| Follow-up studies Follow up studies were included as they may further highlight differences in experiences between African and Caribbean and Non-African and Caribbean women. Observing whether any differences that may exist among African and Caribbean women is pertinent as there may be a difference in access to alternative childrearing options that may affect their risk of developing mental health issues. |

Additional File 4: Inclusion criteria
